# Supplementary material for: Endosomal TLR3 co-receptor CLEC18A enhances host immune response to viral infection
Source: PubMed Central journal article supplement (PMC7893028; doi:10.1038/s42003-021-01745-7), 2021-02-18
Supplement: 42003_2021_1745_MOESM1_ESM.pdf [file 42003_2021_1745_MOESM1_ESM.pdf]

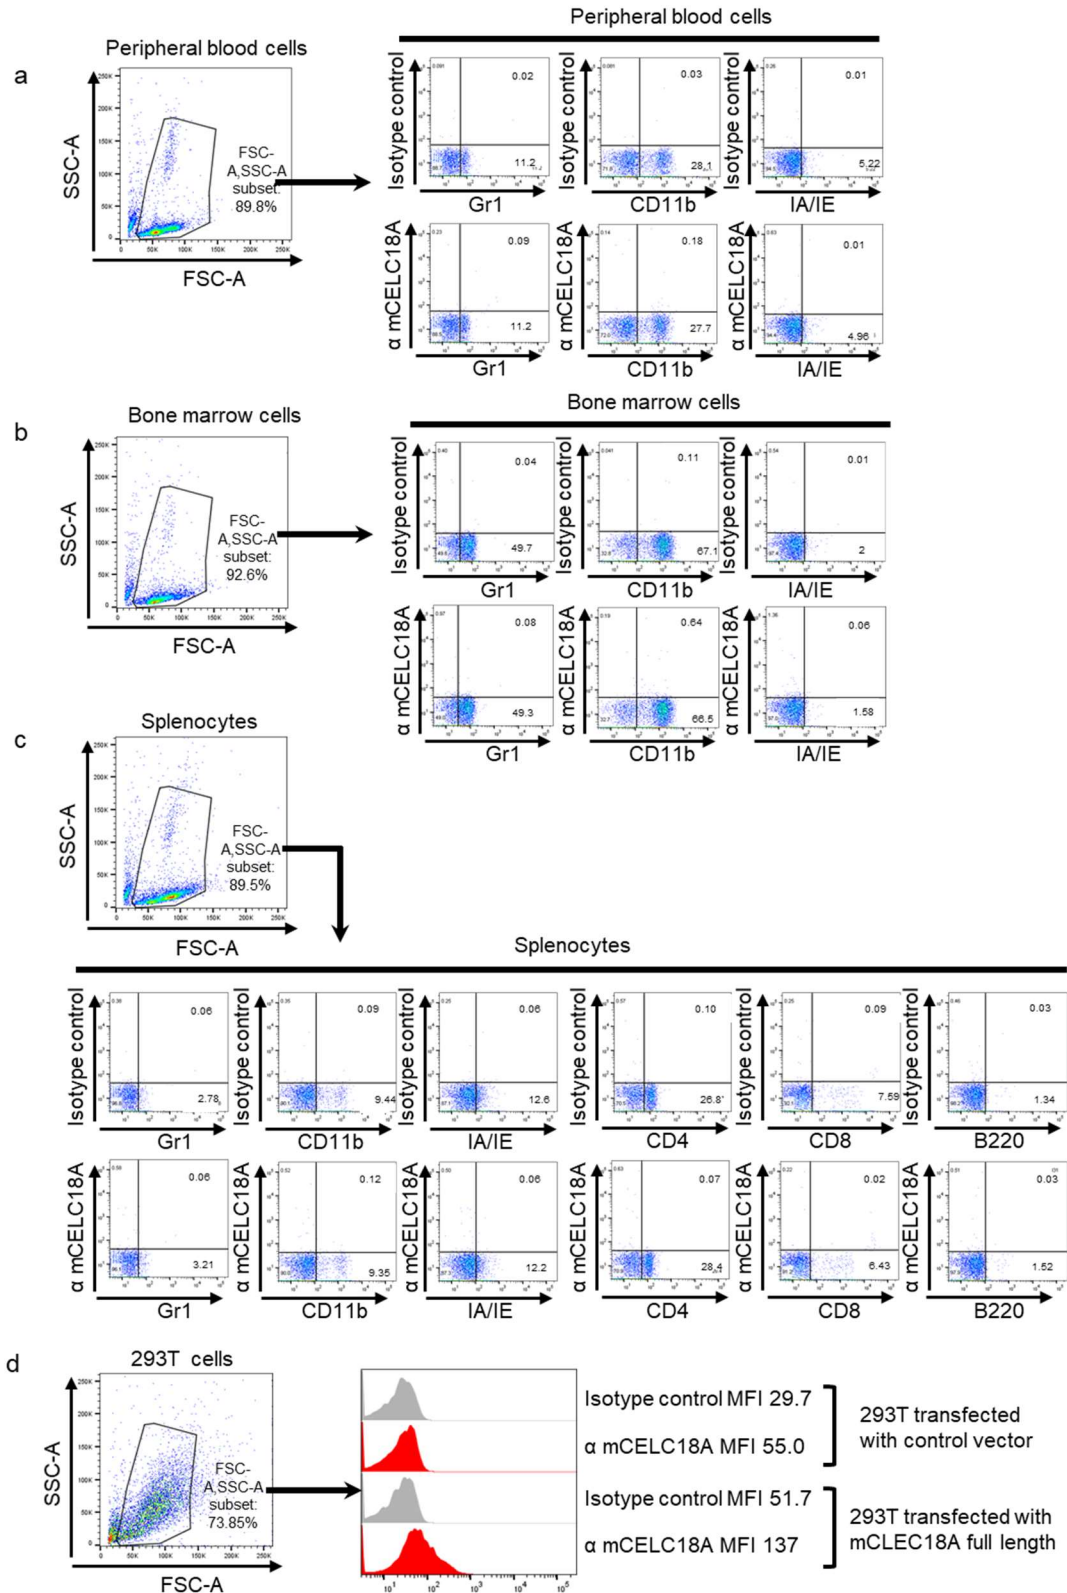

**Supplementary Figure 1. Determination of mCLEC18A expression by flow cytometry**

Mouse peripheral blood cells (a), bone marrow cells (b), and splenocytes (c) were

isolated from WT mice, followed by incubation with fluorochrome-conjugated mAb to detect various cell surface markers and endogenous intracellular CLEC18A by flow cytometry. (d) Detection of endogenous mCLEC18A by flow cytometry. The 293T cells were transfected with pCMV-Tag4A-mCLEC18A to express mCLEC18A as positive control for intracellular staining.

a

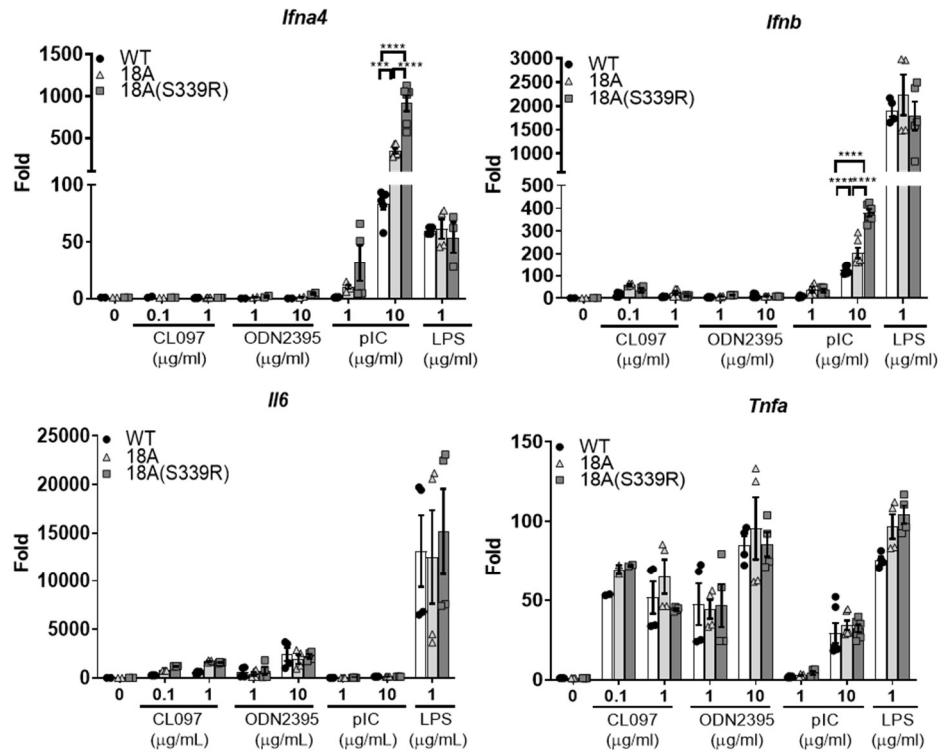

b

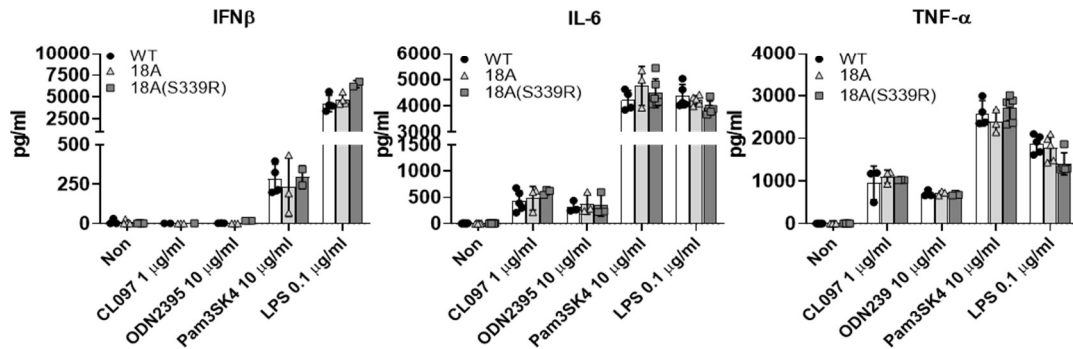

## Supplementary Figure 2. Effect of TLR ligands to induce cytokine expression in BMDMs

BMDMs ( $1 \times 10^6$ /well) from WT, ROSA-CLEC18A and ROSA-CLEC18A(S339R) mice were incubated with various TLR ligands for 12 or 24 hr, and samples were harvested to determine cytokine expression by RT-PCR (a) and ELISA (b) One-way ANOVA was performed. \*  $p < 0.05$ , \*\* $p < 0.01$ , \*\*\* $P < 0.001$ , for WT group versus group of CLEC18A or CLEC18A(S339R). BMDMs: bone marrow derived macrophages.

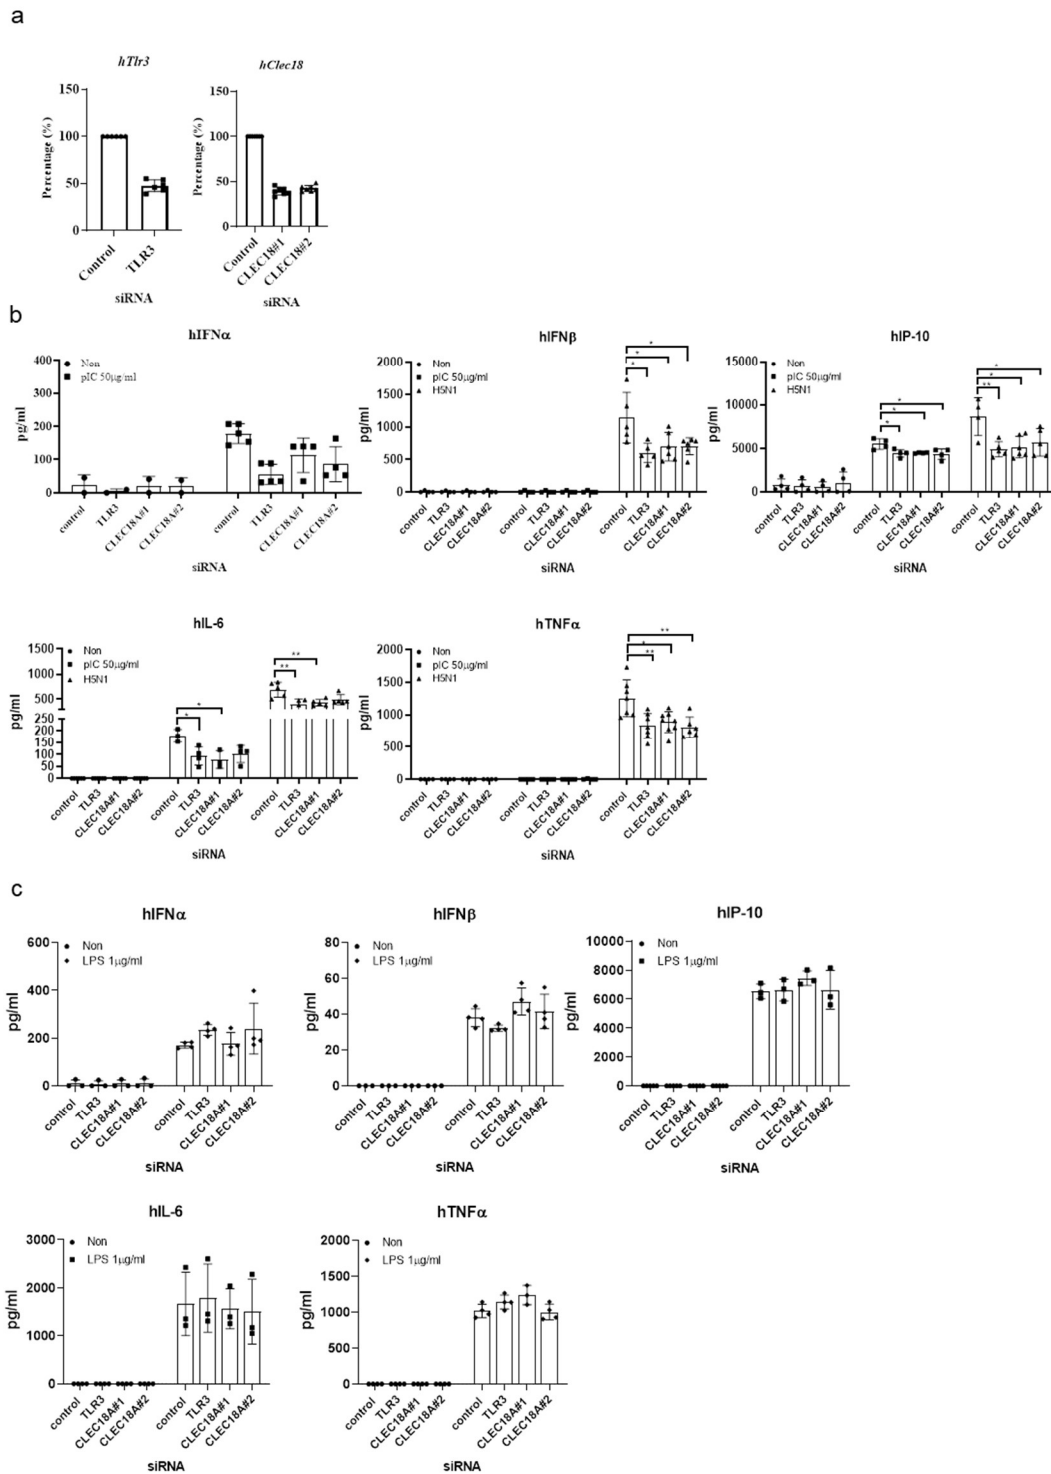

**Supplementary Figure 3. CLEC18 enhances the expression of IFN and proinflammatory cytokines in human macrophages**

(a) The expression level of *hTlr3* and *hCLEC18* in siRNA-transfected human macrophage cells. (b&c) Human macrophages ( $7 \times 10^4$ /well) were transfected with human TLR3 or CLEC18 siRNA for 48 hr, followed by incubation with high

molecular weight poly (I:C) ( $50 \mu\text{g/ml}$ ) and H5N1 virus (M.O.I. = 2) (b), or LPS ( $1 \mu\text{g/ml}$ ) (c) for 24 hr. Samples were harvested to determine cytokine expression by ELISA. One-way ANOVA was performed. \*  $p < 0.05$ , \*\* $p < 0.01$ , \*\*\* $P < 0.001$ , for control group versus group of TLR3 or CLEC18 siRNA. pIC: poly (I:C).

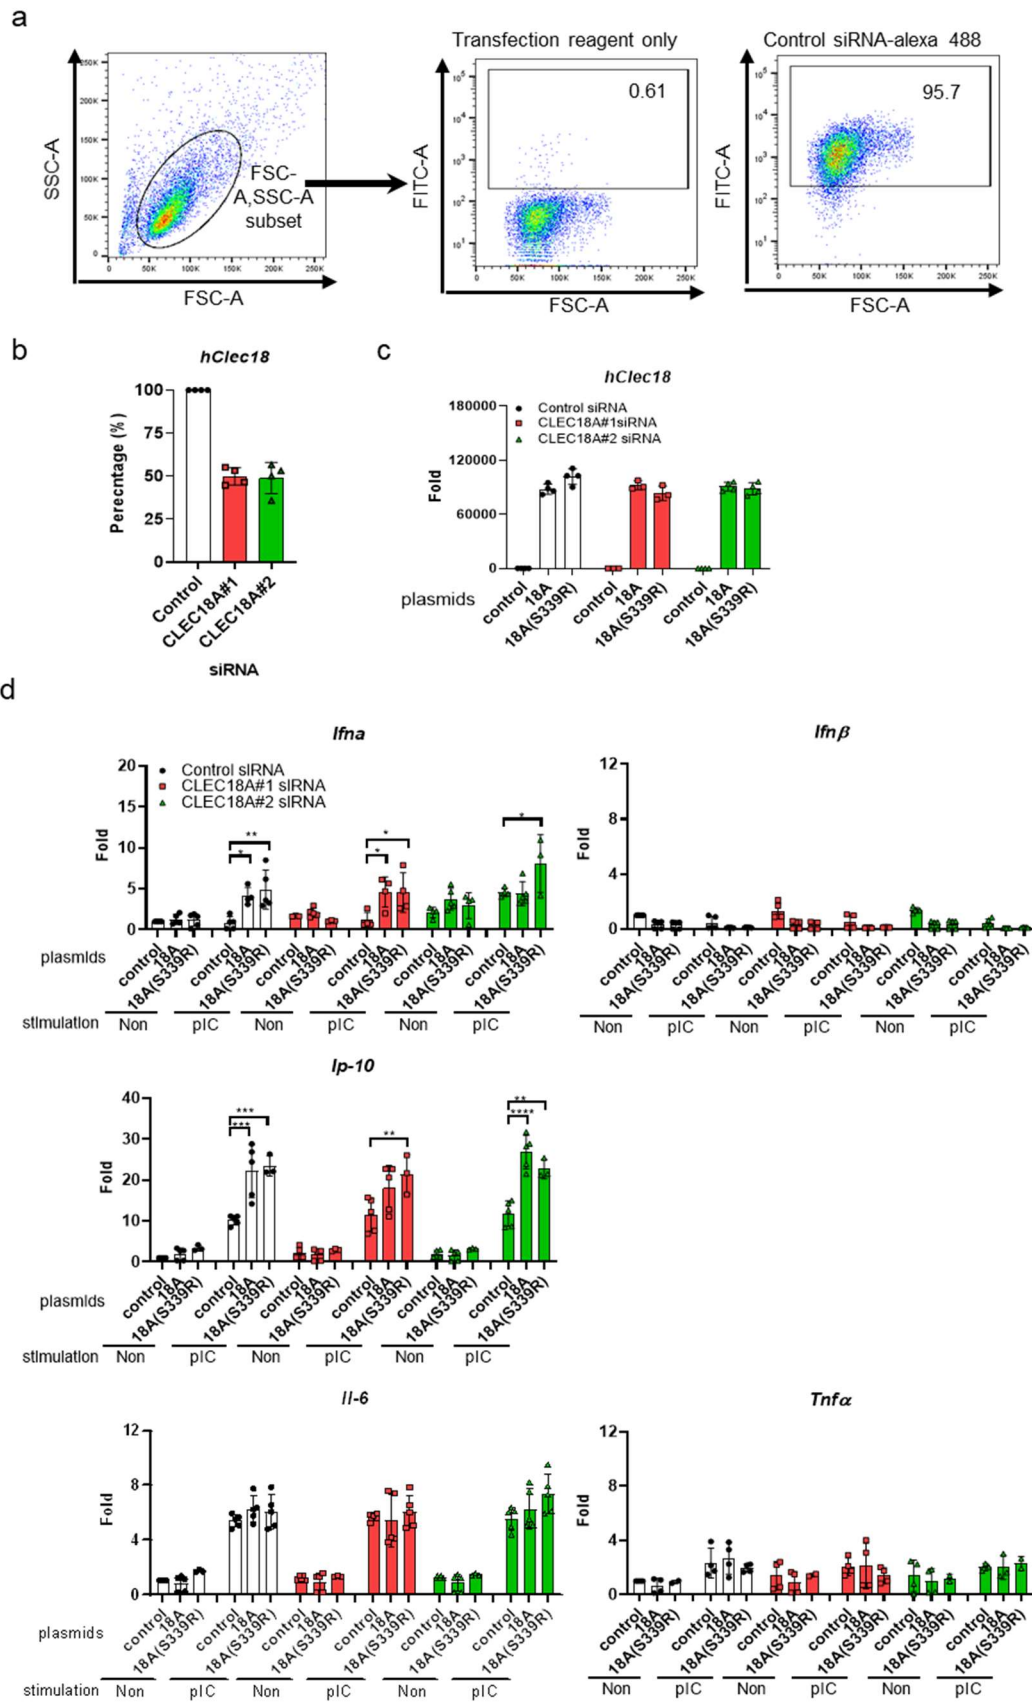

**Supplementary Figure 4. CLEC18 enhances IFN cytokines production in HT1080 cell lines**

(a) The transfection efficiency of control siRNA-alexa 488 is shown by flow cytometry. (b) The expression levels of *hCLEC18* in siRNA transfected HT1080 cells were determined by RT-PCR. (c) The expression level of *hCLEC18* in plasmid transfected cells that firstly transfect with siRNA was determined by RT-PCR. (d) The siRNA-transfected HT1080 cells were further transfected with control vector, pMACS.Kk-HA(C)-hCLEC18A and pMACS.Kk-HA(C)-hCLEC18A(S339R) for 24 h, and further incubated with high molecular weight poly (I:C) ( $50 \mu\text{g/ml}$ ) for 8 h. Samples were harvested to determine cytokine expression by qPCR. Two-way ANOVA was performed. \*  $p < 0.05$ , \*\* $p < 0.01$ , \*\*\* $P < 0.001$ , for control vectors group versus group of hCLEC18A or hCLEC18A(S339R) plasmids. pIC: poly (I:C). White color: HT1080 transfected with control siRNA; Red color: HT1080 transfected with CLEC18A#1 siRNA; Green color: HT1080 transfected with CLEC18A#2 siRNA;

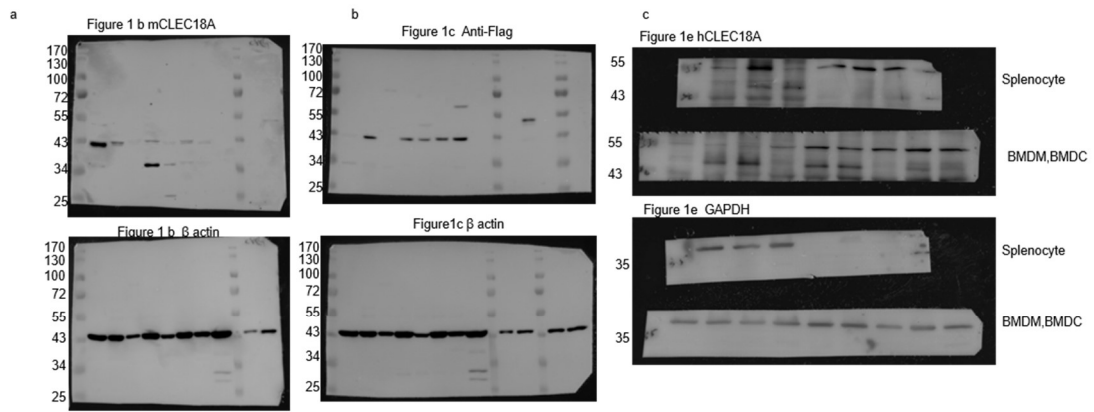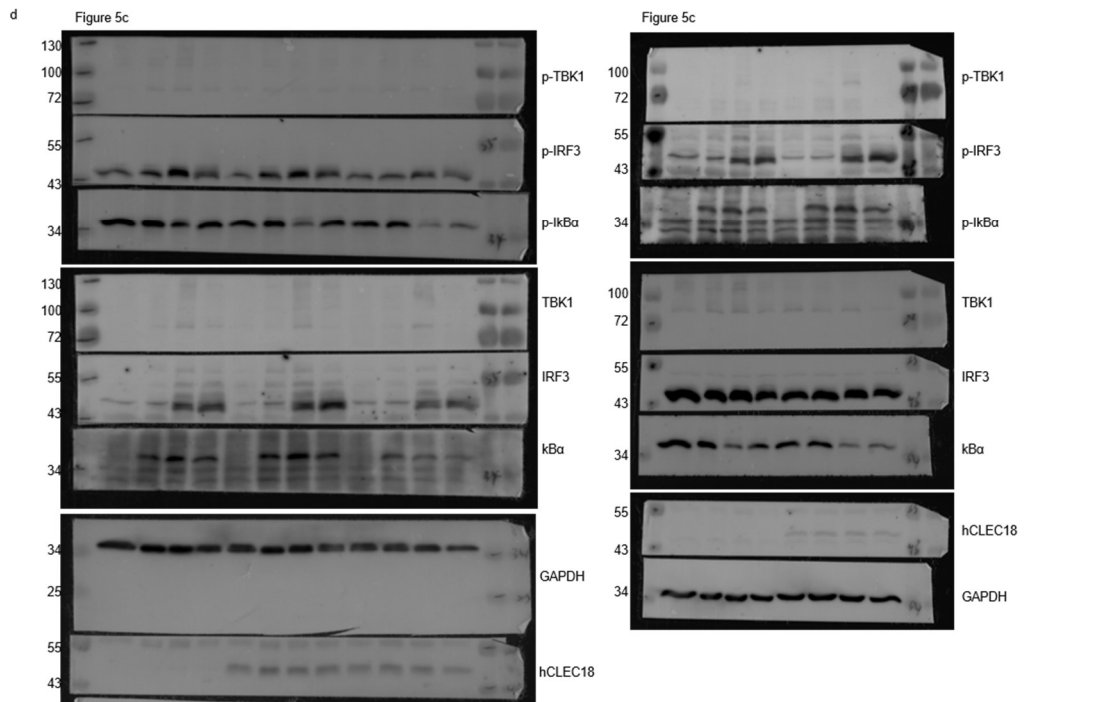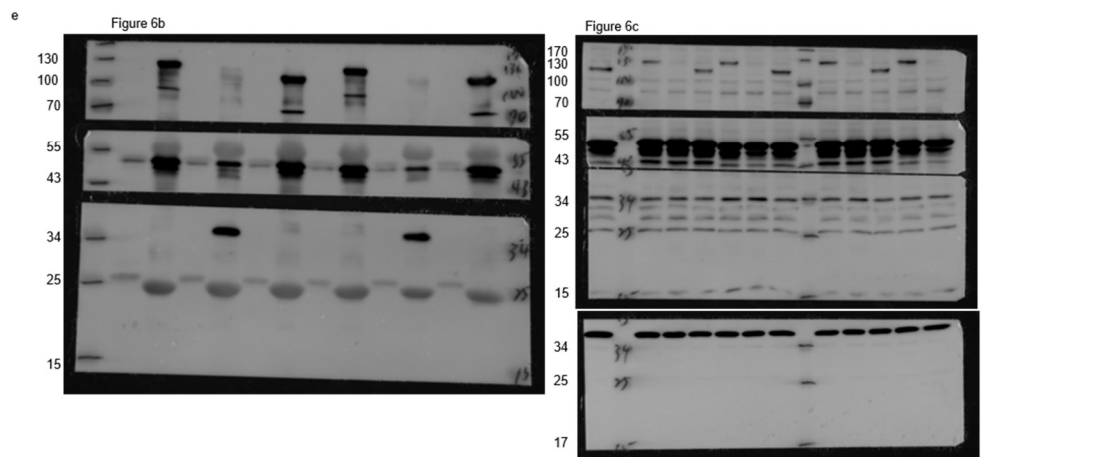



f

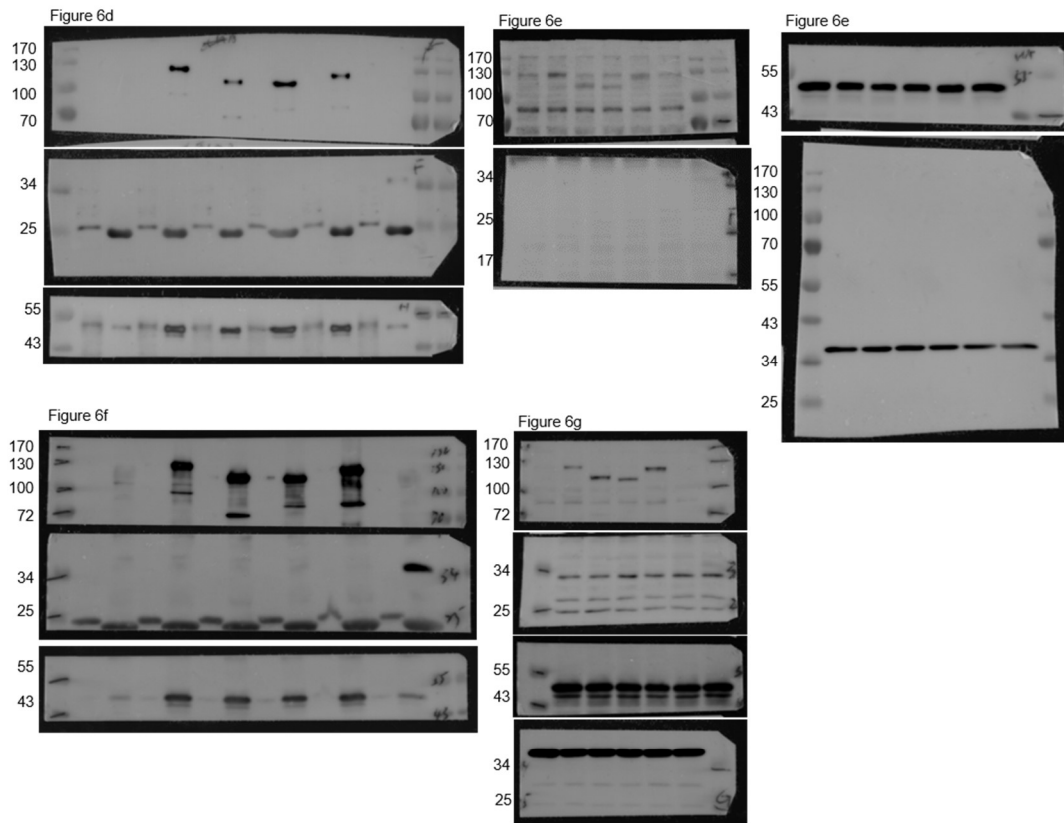

g

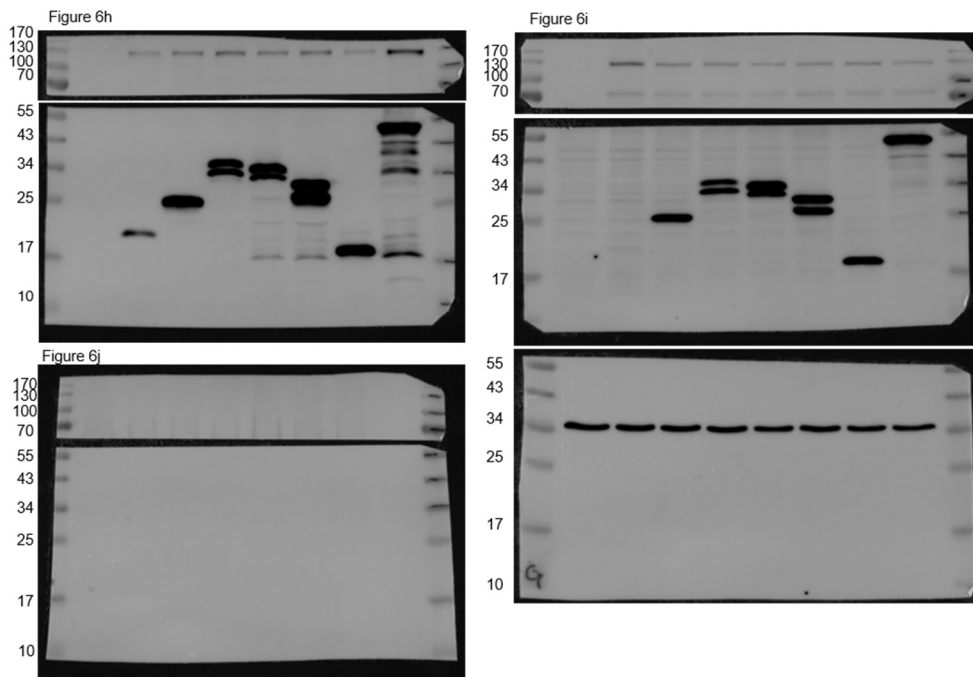

**Supplementary Figure 5. Full blot shows in Fig1, Fig5, Fig6**

(a~c) Blots shown in Figure 1b,c&e; (d) Blots shown in Figure 5c; (e~g) Blots shown in Figure 6 b~j.

| Primer             | Forward                            | Reverse                         |
|--------------------|------------------------------------|---------------------------------|
| hGapdh             | 5'-ccactcctccaccttgac-3'           | 5'-accctgttgctgtagcca -3'       |
| hlf $\beta$        | 5'-aaactcatgagcagctctgca -3'       | 5'- actatgggccaggcacagtg -3'    |
| hlfna1/13          | 5'- tggctgtgaagaaatacttccg-3'      | 5'- tgtttcatgttgaccagatg-3'     |
| hTnf $\alpha$      | 5' acaagcctgtagcccatgtt-3'         | 5'- aaagtagacctgcccagact-3'     |
| hll-6              | 5'-gtagccgccccacacaga-3'           | 5'-catgtctccttctcagggctg -3'    |
| mgapdh             | 5'-gcatccactgggtgctgcc-3',         | 5'-tcatcatacttggcagggttc-3'     |
| mlfn $\beta$       | 5'-ccaccactcattctgaggca -3'        | 5'- atggggccgagcagagat-3'       |
| mlfna4             | 5'-tactcagcagacctgaacct-3'         | 5'-cagtctggcagcaagttgac -3'     |
| mlfn $\lambda$ 2/3 | 5` - agctgcaggcctcaaaaag -3`       | 5` - tgggagtgaatgtggctcag -3`   |
| mTnf $\alpha$      | 5'-gcctcttctcattctgctg -3'         | 5'-ctgatgagagggaggccatt -3'     |
| mll-6              | 5'-ctgcaagagacttccatccagtt-3'      | 5'-gaagtagggaaggccgtgg-3'       |
| mMx1               | 5` -aaccctgctaccttcaa-3`           | 5` -aagcatcgtttctctatttc-3`     |
| mCh25h             | 5'-tgctacaacgggtcggagc -3'         | 5'-agaagcccacgtaagtgatgat -3'   |
| mlsg15             | 5'-tgggacctaaaggtgaagatgctg-3'     | 5'-tgcttgatcactgtgcactggg -3'   |
| M gene             | 5'-cttctaaccgaggtcgaaacg-3'        | 5'-ggcattttggacaaagcgtcta-3'    |
| NP gene            | 5'-tttctagcacgggtctgcactcatattg-3' | 5'-cttggctgtttgaagcagctgaaag-3' |

**Supplementary Table I. Primer list**

| protein                  | Protein size (MW) | loading protein (ug) | Con.(nM)           |
|--------------------------|-------------------|----------------------|--------------------|
| ecdTLR3-Fc               | 130k              | 1.18                 | 45.4               |
| CLEC18A-Fc               | 55k               | 0.5                  | 45.4               |
| CLEC18A(S339R)-Fc        | 55k               | 0.5                  | 45.4               |
| dsRNA                    | dsRNA size (MW)   | dsRNA strength (kb)  | loading dsRNA (ug) |
| Poly(I:C) HMW            | 3135k             | 1.5-8 (ave=4.75kb)   | 10                 |
| pH 6.3 condition         | kon(1/Ms)         | kdis(1/s)            | KD (M)             |
| ecdTLR3-Fc               | 8.13E+05          | 4.54E-03             | 5.59E-09           |
| CLEC18A-Fc               | 2.08E+06          | 4.37E-02             | 2.10E-08           |
| CLEC18A(S339R)-Fc        | 2.38E+06          | 1.95E-02             | 8.17E-09           |
| ecdTLR3-Fc+18A-Fc        | 5.89E+06          | 2.63E-03             | 4.46E-10           |
| ecdTLR3-Fc+18A(S339R)-Fc | 4.69E-03          | <1.0E-07             | <1.0E-12           |

**Supplementary Table II. Determination of affinity of poly (I:C)-CLEC18 versus poly (I:C)-TLR3**

Bio-layer interferometry (BLI, ForteBio) binding assays show the binding affinity between CLEC18-CTLD and ecdTLR3 fusion protein to HMW poly (I:C), respectively. The biotinylated-CLEC18A-CTLD-Fc, CLEC18A(S339R)-CTLD-Fc and ecdTLR3-Fc were immobilized on streptavidin (SA)-coated biosensor tips, respectively, followed by incubation with HMW poly (I:C) in PiBS binding buffer (20  $\mu$ M Pipes, 150 mM NaCl, pH = 6.3). The processed data were fitted with the integrated fitting function by a 1:1 binding mode. The various KD values obtained by curve fitting were summarized in supplementary Table II. CTLD: C- type lectin like domain; ecd: extracellular domain; HMW: high molecular weight.
