# Supplementary material for: Endosomal TLR3 co-receptor CLEC18A enhances host immune response to viral infection
Source: PubMed Central journal article supplement (PMC7893028; doi:10.1038/s42003-021-01745-7), 2021-02-18
Supplement: 42003_2021_1745_MOESM2_ESM.pdf [file 42003_2021_1745_MOESM2_ESM.pdf]

## **Description of Additional Supplementary Files**

**File name:** Supplementary Data 1

**Description:** The source data underlying graphs shown in main figures are presented in Supplementary Data 1.
